# Supplementary material for: Perfectly polar assembly of molecular dipoles in crystals of Zn(ii)(DMAP)(acac)2: a case of self-poling
Source: Royal Society of Chemistry journal article supplement (doi:10.1039/b101248g), 2001-01-01
Supplement: b101248g.doc [file b101248g.doc]

# *Supplementary Information for*

# Perfectly Polar Assembly of Molecular Dipoles in

# Crystals of Zn(II)(DMAP)(acac)2 – A Case of Self-poling

# S. Philip Anthony and T. P. Radhakrishnan

# Contents

# Synthesis and characterization Page 2

# Details of Crystal Structure Determination Page 2

# Molecular Structure Page 3

# Tables of crystallographic data Pages 3 - 5

# Crystallographic data and packing diagram of

# (4-morpholinopyridyl)bis­(acetyl­acetonato)Zn(II) Page 6

#

# Synthesis and Characterization

Solutions of 200 mg (0.76 mmol) of Zn(acac)2.H2O in 30 ml of methanol and 93 mg (0.76 mmol) of DMAP in 10 ml methanol were mixed to obtain 230 mg (90% yield) of ZNDA. Crystals were grown from methanol solutions by slow evaporation.

M.P. / oC : 237-240

IR (KBr pellet) / cm-1 : 3078.7, 2918.6 (C-H stretch), 1608.8 (aromatic C=C stretch), 1010.8 (C-H bend).

UV-Vis (methanol) / nm : 262, 282 (max); cut-off = 330 nm.

1H NMR /  ppm : 1.85 (s, 12H), 2.98 (s, 6H), 5.25 (s,2H), 6.67 (d, *J*=6Hz, 2H), 8.01 (d, *J*=6Hz, 2H).

## Details of Crystal Structure Determination

Single crystal x-ray data were measured on an ENRAF-NONIUS MACH3 diffractometer. MoKa ( = 0.71073 Å) radiation with a graphite crystal monochromator in the incident beam was used. The standard CAD4 centering, indexing and data collection programs were used. The unit cell dimensions were obtained by a least-squares fit of 24 centered reflections in the neighborhood of q = 10o. Intensity data were collected using the  scan method at a scan speed of 4.12o/min to a maximum 2q of 50o. The scan width,  for each reflection was 0.80 + 0.35 tanq. During data collection the intensities of three standard reflections were monitored every 1.5 h; no decay was observed. Three orientation standards were monitored every 250 reflections to check the effects of crystal movement. Intensities were corrected for Lorentz and polarization effects. Empirical absorption correction was applied using –scan data. Non H atoms were found using the SHELXS-97 direct method analysis and were refined anisotropically. H atoms were added at idealized positions for structure factor calculation, but were not refined (all computations were carried out on a Pentium PC using SHELXL-97). Refinement proceeded to convergence by minimizing Sw(Fo2-Fc2). A final difference Fourier synthesis map showed the largest difference peak and hole to be very small. The R indices are calculated as R=S½(½Fo½-½Fc½)½/S½Fo½ and wR2=[Sw(Fo2-Fc2)2/S(Fo2)2]1/2. The pertinent crystallographic data are provided in the following tables.

# Molecular Structure of ZNDA

(ORTEP diagram showing 10% probability thermal ellipsoids)

# Table 1. Detailed crystallographic data for ZNDA

| Identification code | ZNDA |
| --- | --- |
| Empirical formula | C8.50H12NO2 Zn0.5 |
| 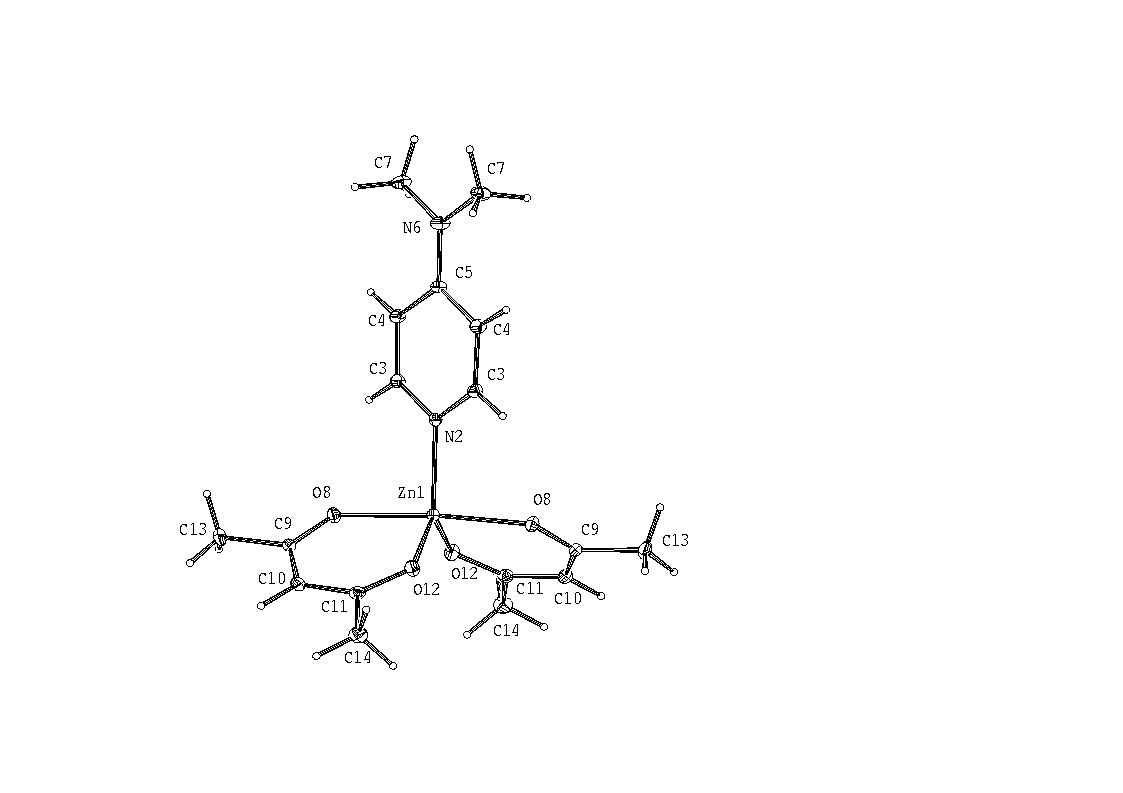Formula weight | 192.88 |
| Crystal system | Orthorhombic |
| Space group | Fdd2 |
| Color / appearance | Colorless Plate |
| Dimensions / mm3 | 0.6 x 0.4 x 0.3 |
| a / Å | 28.057(4) |
| b / Å | 11.363(2) |
| c / Å | 11.3253(17) |
| V / Å3 | 3610.6(10) |
| Z | 16 |
| calc. / g cm-3 | 1.419 |
|  / mm-1 | 1.383 |
| Absorption correction | Empirical (–scan) :  Tmin = 0.988, Tmax = 0.978 |
| Temperature / K | 293(2) |
|  / Å | 0.71073 |
| 2 range / deg. | 2.64 – 30.92 |
| Unique reflections | 1496 |
| Reflection with I  2I | 1353 |
| No. of parameters | 117 |
| GOF | 1.064 |
| R [for I  2I] | 0.0257 |
| wR2 | 0.0626 |
| Largest difference peak and hole / eÅ-3 | 0.52/-0.24 |

**Table 2**: Atomic coordinates (x 104 Å) and equivalent isotropic

displacement parameters (x 103 Å2) in ZNDA

| Atom | x | y | z | Ueq |
| --- | --- | --- | --- | --- |
| Zn(1) | 0 | 0 | 9845(1) | 32(1) |
| O(8) | -480(1) | 1368(1) | 9757(2) | 42(1) |
| O(12) | -467(1) | -1021(2) | 8995(2) | 45(1) |
| N(2) | 0 | 0 | 11640(3) | 33(1) |
| N(6) | 0 | 0 | 15326(5) | 50(1) |
| C(3) | -59(1) | 985(2) | 12277(2) | 40(1) |
| C(4) | -56(1) | 1035(3) | 13486(3) | 42(1) |
| C(5) | 0 | 0 | 14142(5) | 35(1) |
| C(7) | -40(1) | 1093(5) | 16000(4) | 56(1) |
| C(9) | -874(1) | 1352(2) | 9234(2) | 38(1) |
| C(10) | -1064(1) | 400(2) | 8619(2) | 44(1) |
| C(11) | -858(1) | -714(2) | 8542(2) | 40(1) |
| C(13) | -1163(1) | 2469(2) | 9308(4) | 59(1) |
| C(14) | -1116(1) | -1667(2) | 7870(3) | 56(1) |

**Table 3.** Bond lengths in ZNDA

| Atom-atom | Bond Length (Å) |
| --- | --- |
| Zn(1)-O(12) | 1.9972(17) |
| Zn(1)-O(12)#1 | 1.9972(17) |
| Zn(1)-N(2) | 2.033(3) |
| Zn(1)-O(8) | 2.0593(15) |
| Zn(1)-O(8)#1 | 2.0593(15) |
| O(8)-C(9) | 1.253(3) |
| O(12)-C(11) | 1.261(3) |
| N(2)-C(3) | 1.342(3) |
| N(2)-C(3)#1 | 1.342(3) |
| N(6)-C(5) | 1.341(5) |
| N(6)-C(7) | 1.462(5) |
| N(6)-C(7)#1 | 1.462(5) |
| C(3)-C(4) | 1.371(5) |
| C(4)-C(5) | 1.400(5) |
| C(5)-C(4)#1 | 1.400(5) |
| C(9)-C(10) | 1.392(3) |
| C(9)-C(13) | 1.509(3) |
| C(10)-C(11) | 1.394(4) |
| C(11)-C(14) | 1.508(3) |

Symmetry transformations used to generate equivalent atoms:

#1 -x,-y,z

**Table 4.** Bond angles in ZNDA

| Atom-atom-atom | Bond angle (o) |
| --- | --- |
| O(12)-Zn(1)-O(12)#1 | 122.37(13) |
| O(12)-Zn(1)-N(2) | 118.81(6) |
| O(12)#1-Zn(1)-N(2) | 118.81(6) |
| O(12)-Zn(1)-O(8) | 89.20(7) |
| O(12)#1-Zn(1)-O(8) | 88.15(8) |
| N(2)-Zn(1)-O(8) | 92.75(6) |
| O(12)-Zn(1)-O(8)#1 | 88.15(8) |
| O(12)#1-Zn(1)-O(8)# | 89.20(7) |
| N(2)-Zn(1)-O(8)#1 | 92.75(6) |
| O(8)-Zn(1)-O(8)#1 | 174.50(13) |
| C(9)-O(8)-Zn(1) | 126.05(16) |
| C(11)-O(12)-Zn(1) | 127.32(17) |
| C(3)-N(2)-C(3)#1 | 115.0(3) |
| C(3)-N(2)-Zn(1) | 122.51(15) |
| C(3)#1-N(2)-Zn(1) | 122.51(15) |
| C(5)-N(6)-C(7) | 121.5(3) |
| C(5)-N(6)-C(7)#1 | 121.5(3) |
| C(7)-N(6)-C(7)#1 | 117.1(6) |
| N(2)-C(3)-C(4) | 124.8(3) |
| C(3)-C(4)-C(5) | 119.8(3) |
| N(6)-C(5)-C(4) | 122.1(3) |
| N(6)-C(5)-C(4)#1 | 122.1(3) |
| C(4)-C(5)-C(4)#1 | 115.9(5) |
| O(8)-C(9)-C(10) | 125.8(2) |
| O(8)-C(9)-C(13) | 115.8(2) |
| C(10)-C(9)-C(13) | 118.4(2) |
| C(9)-C(10)-C(11) | 125.3(2) |
| O(12)-C(11)-C(10) | 125.9(2) |
| O(12)-C(11)-C(14) | 115.1(2) |
| C(10)-C(11)-C(14) | 119.0(2) |

Symmetry transformations used to generate equivalent atoms:

#1 -x,-y,z

**Table 5.** Anisotropic displacement parameters (x 103 Å 2) in ZNDA.

The anisotropic displacement factor exponent takes the form:

-2 2 [ h2 a*2 U11 + ... + 2 h k a* b* U12 ]

| Atom | U11 | U22 | U33 | U23 | U13 | U12 |
| --- | --- | --- | --- | --- | --- | --- |
| Zn(1) | 31(1) | 34(1) | 31(1) | 0 | 0 | 2(1) |
| O(8) | 41(1) | 37(1) | 48(1) | -2(1) | -8(1) | 6(1) |
| O(12) | 43(1) | 38(1) | 54(1) | -8(1) | -10(1) | 2(1) |
| N(2) | 35(1) | 29(1) | 35(1) | 0 | 0 | 3(1) |
| N(6) | 83(4) | 33(2) | 33(2) | 0 | 0 | -7(2) |
| C(3) | 56(1) | 26(1) | 37(1) | 2(1) | -3(1) | 5(1) |
| C(4) | 64(2) | 23(1) | 39(2) | -5(1) | 0(1) | 1(1) |
| C(5) | 43(2) | 35(2) | 27(2) | 0 | 0 | -4(1) |
| C(7) | 77(2) | 55(2) | 38(2) | -12(1) | -1(2) | -6(2) |
| C(9) | 39(1) | 41(1) | 33(1) | 5(1) | -1(1) | 8(1) |
| C(10) | 38(1) | 56(1) | 40(1) | -1(1) | -8(1) | 4(1) |
| C(11) | 38(1) | 49(1) | 34(1) | -4(1) | -1(1) | -6(1) |
| C(13) | 58(2) | 58(2) | 61(2) | -1(1) | -13(2) | 25(1) |
| C(14) | 53(1) | 59(2) | 56(2) | -11(1) | -9(1) | -10(1) |

**Table 6.** Hydrogen coordinates ( x 104 Å) and isotropic

displacement parameters (x 103Å 2) in ZNDA.

| Atom | x | y | z | Ueq |
| --- | --- | --- | --- | --- |
| H(3) | -105 | 1686 | 11867 | 48 |
| H(4) | -91 | 1754 | 13869 | 50 |
| H(7A) | 192 | 1649 | 15717 | 85 |
| H(7B) | 17 | 935 | 16820 | 85 |
| H(7C) | -354 | 1414 | 15904 | 85 |
| H(10) | -1351 | 518 | 8228 | 53 |
| H(13A) | -1256 | 2605 | 10112 | 88 |
| H(13B) | -1443 | 2394 | 8825 | 88 |
| H(13C) | -975 | 3119 | 9033 | 88 |
| H(14A) | -905 | -2003 | 7294 | 84 |
| H(14B) | -1389 | -1336 | 7480 | 84 |
| H(14C) | -1218 | -2268 | 8409 | 84 |

# Crystallographic data for (4-morpholinopyridyl)­bis­(acetyl­acetonato)Zn(II)

| Empirical formula | C9.50H13NO2.50Zn0.5 |
| --- | --- |
| Formula weight | 213.89 |
| Crystal system | Monoclinic |
| Space group | Cm |
| Color / appearance | Colorless Plate |
| 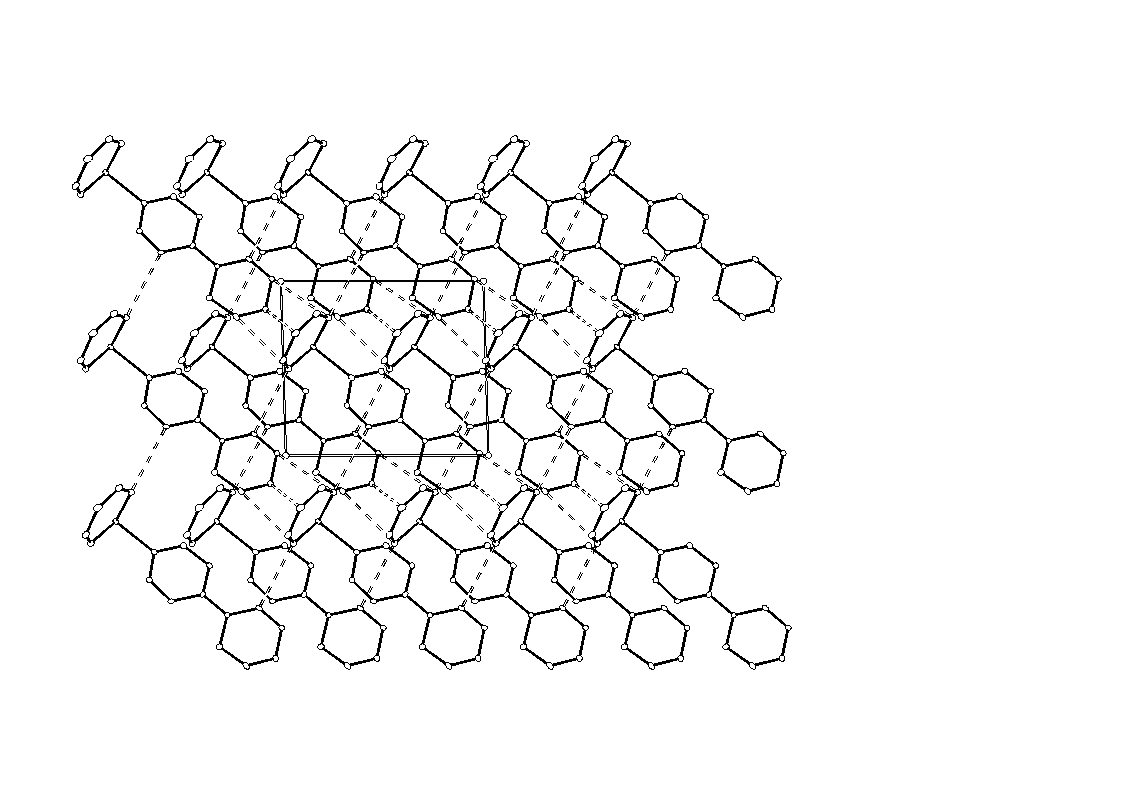Dimensions / mm3 | 0.64 x 0.64 x 0.2 |
| a / Å | 8.601(9) |
| b / Å | 14.833(12) |
| c / Å | 7.782(8) |
|  /o | 91.57(8) |
| V / Å3 | 992.4(17) |
| Z | 4 |
| calc. / g cm-3 | 1.432 |
|  / mm-1 | 1.27 |
| Absorption correction | Empirical (–scan) :  Tmin = 0.7896, Tmax = 0.9739 |
| Temperature / K | 293(2) |
|  / Å | 0.71073 |
| 2 range / deg. | 2.74 – 27.96 |
| Unique reflections | 1305 |
| Reflection with I  2I | 1265 |
| No. of parameters | 159 |
| GOF | 1.023 |
| R [for I  2I] | 0.0762 |
| wR2 | 0.1902 |
| Largest difference peak and hole / eÅ-3 | 1.28/-1.72 |

# Packing in (4-morpholinopyridyl)­bis­(acetyl­acetonato)Zn(II)

# Projection on the *ac* plane showing the network of weak interactions; H atoms and C atoms of the methyl groups of the acac ligand are omitted for clarity.
