# Supplementary figures and images for: Perfectly polar assembly of molecular dipoles in crystals of Zn(ii)(DMAP)(acac)2: a case of self-poling
Source: Royal Society of Chemistry journal article supplement (doi:10.1039/b101248g), 2001-01-01

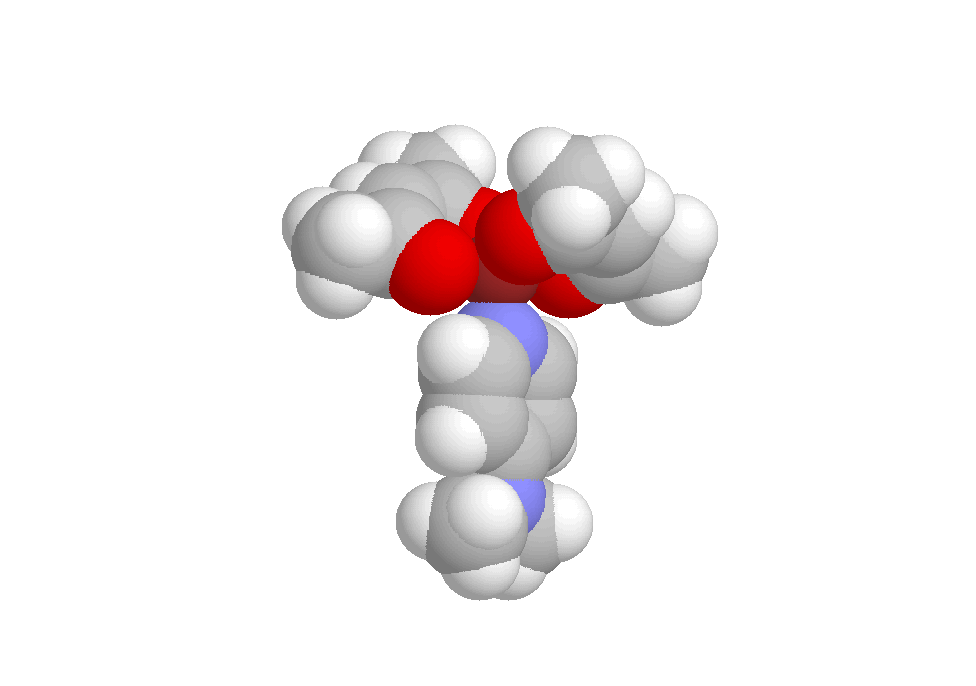


# Figure 1

Supplement: b101248gf1.doc [file b101248gf1.doc]
